# Supplementary material
Source: ML conference proceedings conference paper supplement (https://openaccess.thecvf.com/content/WACV2023/html/Seon_Stop_or_Forward_WACV_2023_paper.html)

# Stop or Forward: Dynamic Layer Skipping for Efficient Action Recognition

## Supplementary Materials

### 1. SoF-Net with other algorithms and datasets

Table A presents the performance of SoF-Net when it is integrated into TSM [19] on ActivityNet-v1.3 (val) while Table B shows the results on mini-Sports1M. Since the official download link of FCVID is broken, we cannot run on it.

Table A: Results of SoF-Net with TSM on ActivityNet-v1.3 (val). ET denotes early termination.

| Method                        | mAP         | GFLOPS/V    | Frame Usage (%) |
|-------------------------------|-------------|-------------|-----------------|
| TSM [19]                      | 73.0        | 40.3        | 100.0           |
| SoF-Net <sup>TSM</sup> w/o ET | <b>74.1</b> | 26.7        | 49.6            |
| SoF-Net <sup>TSM</sup>        | 73.9        | <b>22.4</b> | <b>44.1</b>     |

Table B: Results on mini-Sports1M.

| Method   | Top 1       | GFLOPS/V    | Frame Usage (%) |
|----------|-------------|-------------|-----------------|
| TSN [32] | 39.2        | 40.3        | 100.0           |
| AR-Net   | 39.1        | 41.2        | 73.0            |
| SoF-Net  | <b>41.2</b> | <b>29.0</b> | <b>53.2</b>     |

### 2. Hyperparameters for early termination

Table C shows clear trade-off between accuracy and efficiency with the early termination threshold on ActivityNet-v1.3 (val).

Table C: Ablation study on the hyperparameters for early termination. We present mAP and GFLOPS/f for each case.

| $\rho$ | $T_{\min} = 2$ | $T_{\min} = 3$     | $T_{\min} = 4$ | $T_{\min} = 5$ |
|--------|----------------|--------------------|----------------|----------------|
| 0.95   | 72.3 / 1.34    | 73.5 / 1.40        | 74.2 / 1.46    | 74.6 / 1.52    |
| 0.99   | 74.1 / 1.54    | 74.6 / 1.59        | 75.0 / 1.62    | 75.0 / 1.67    |
| 0.999  | 74.9 / 1.68    | <b>75.3 / 1.71</b> | 75.3 / 1.74    | 75.2 / 1.77    |

### 3. Ablation study of loss terms

Table D presents the analysis of our loss terms on ActivityNet-v1.3 (val) without early termination; the efficiency loss works as expected and the two terms in  $\mathcal{L}_{pg}$  play their roles.

Table D: Ablation study on  $\alpha$  and  $\beta$  of the loss function in Eq. (7) and (11). The hyphen (–) for  $\beta$  denotes that  $\mathcal{L}_{pg}$  is not used.

| $(\alpha, \beta)$ | (1.0, –) | (0.9, –) | (1.0, 0.0) | (1.0, 0.5) | (1.0, 1.0) | (0.9, 0.5) |
|-------------------|----------|----------|------------|------------|------------|------------|
| mAP               | 75.5     | 75.0     | 75.2       | 75.9       | 74.7       | 75.3       |
| GFLOPS/V          | 37.6     | 31.6     | 37.6       | 38.9       | 35.1       | 31.5       |

### 4. Qualitative Analysis

We present additional examples showing input frames and decision making for them in Figure A. In general, our method removes unimportant frames at an early stage no matter how it predicts correct label or not. On the other hand, early termination only happens for the correctly predicted videos. In the failure cases, the model predicts similar labels (e.g., assembling bicycle instead of fixing bicycle) but it successfully skips less important frames such as beginning and ending moments.

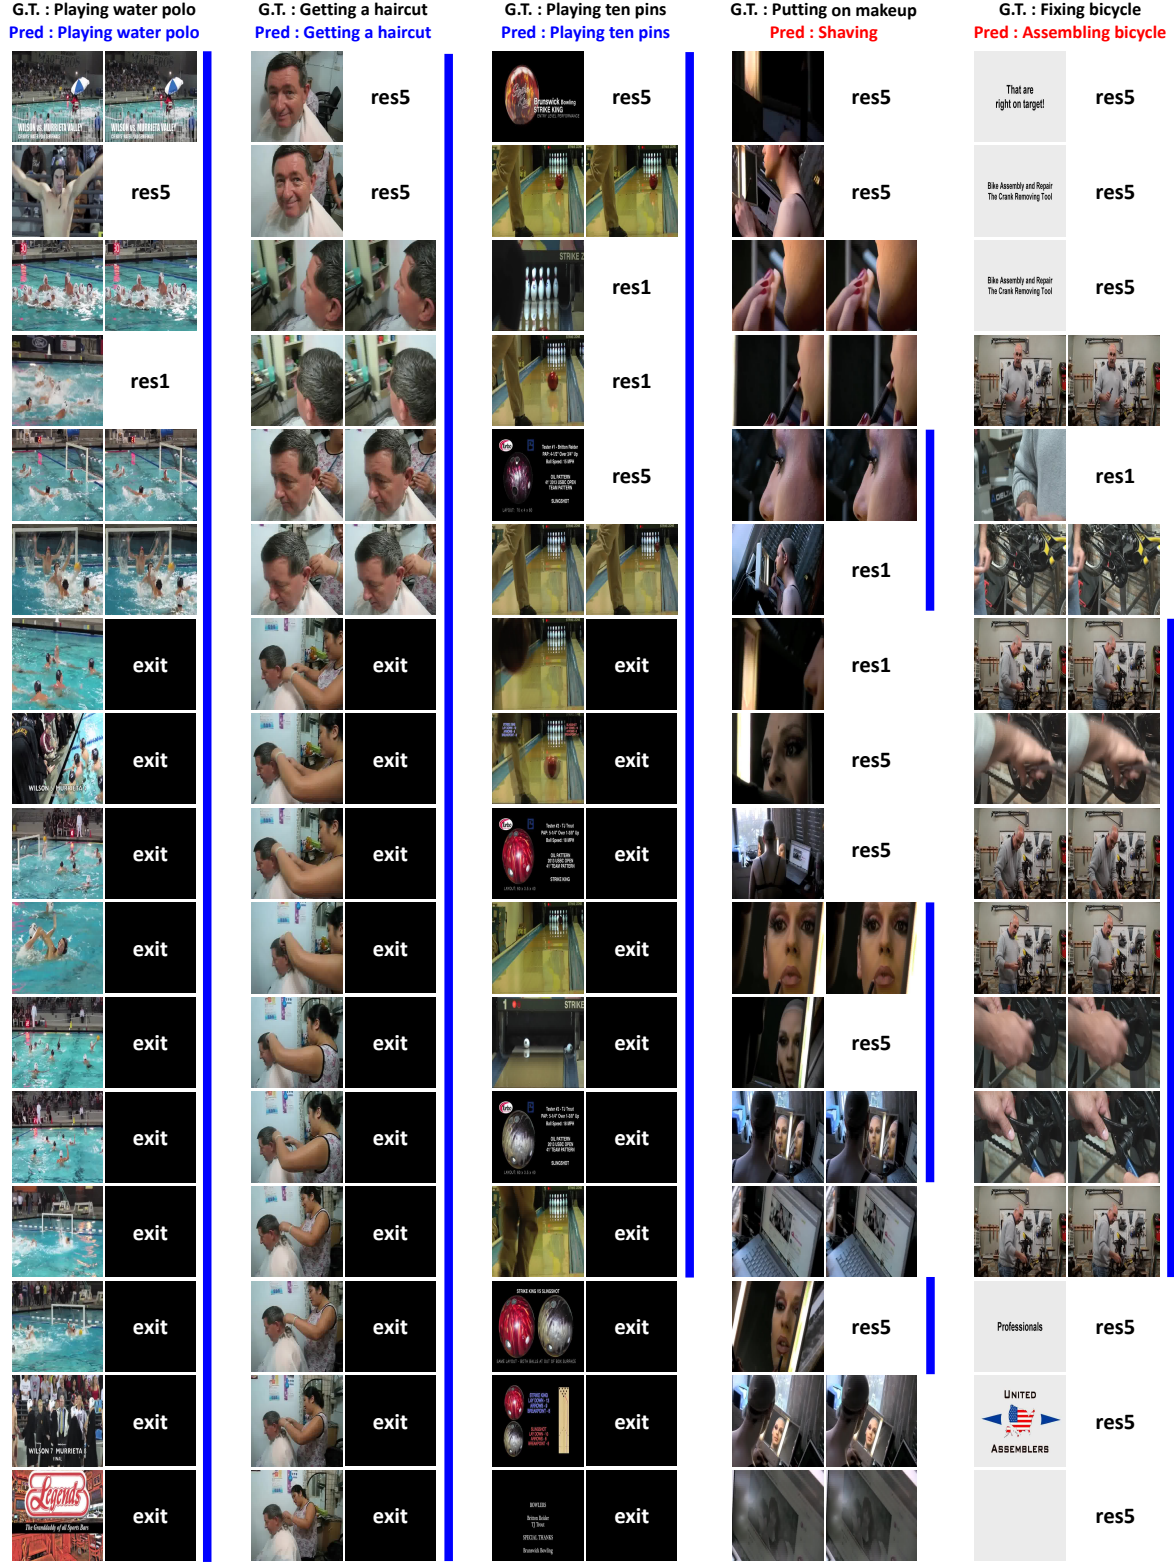

Supplement: Supplementary file 1 [file Seon_Stop_or_Forward_WACV_2023_supplemental.zip]
